# Supplementary material for: Nickelacycles with anionic C–N–N′ terdentate α-diimine based ligands. Reaction with ethylene
Source: Royal Society of Chemistry journal article supplement (doi:10.1039/b302375c), 2003-01-01
Supplement: b302375c1.doc [file b302375c1.doc]

## Experimental Section

# Synthesis of the ligands

*1,4-diazabutadienes*

-1,4-Bis(2-Chlorobenzyl)-2,3-dimethyl-1,4-diaza-1,3-butadiene(**a**),1,4-Bis-[2-(2-chlorophenyl)-ethyl]-2,3- dimethyl-1,4-diaza-1,3-butadiene **(e**)

Over a solution of 0.65g (7.5 mmol) of 2,3-butanedione in 10 cm3 of dichloromethane, 15.5 mmol of the corresponding amine, 2-chlorobenzylamine or 2-(2-chlorophenylethylamine), one drop of formic acid and 3 g of molecular sieves 4 Å were added. When the reaction was finished (24-48h, monitored by 1H NMR), it was filtered off and the solvent removed in vacuum. Diimines **a** and **e** were obtained as white solids after recrystallisation from methanol. Yields 60-70%. Data for **a** : 1H NMR (CDCl3): 7.66 [dd, 1H, 3J(HH)=7.4, 4J(HH)=1.6, 2H], 7.37 [td, 3J(HH)=7.5, 4J(HH)=1.7, 2H], 7.20-7.30 (m, 4H), 4.73 (s, 4H, CH2), 2.29 (s, 6H, CH3) ); (C=N) = 1635 cm-1. Data for **e :** 1H NMR (CDCl3): 7.10-7.40 (m, 8H), 3.68 [t, 3J(HH)=7.5, 4H, CH2], 3.12 [t, 3J(HH)=7.3, 4H, CH2], 1.99 (s, 6H, CH3); 13C NMR (CDCl3): 12.65 (CH3), 34.85 (NCH2*C*H2Ph), 52.07 (N*C*H2CH2Ph), 168.48 (N=C), 138.05, 134.1 (C arom), 131.26, 129.35, 127.5, 126.54 (CH arom); (C=N) = 1630 cm-1.

-1,4-Bis(2-Chlorobenzyl)-2-methyl-1,4-diaza-1,3-butadiene (**b**)

1.02 g (7.2 mmol) of 2-chlorobenzylamine and a drop of formic acid were added over 0.54g (3mmol) of methylglyoxal (40% in water) in 30 cm3 of ice/water. After vigorous stirring for 30 minutes a resinous material was formed, that was washed three times with 50 cm3 of water, redissolved in diethylether and dried with Na2SO4. After filtration and evaporation of the solvent, the residue was dried in vacuum. The formation of the diimine was monitored by 1H NMR. If necessary the residue was dissolved in dry dichloromethane, a drop of formic acid, benzylamine and molecular sieve (4Å) were added and the room temperature stirring continued until completion of the reaction. Data for **b** : 1H NMR (CDCl3): 8.02 (s, 1H), 7.00-7.60 (m, 8H), 4.89 (s, 2H, CH2), 4,76 (s, 2H, CH2), 2.26 (s, 3H, CH3).

-1,4-Bis(2-Chlorobenzyl)-1,4-diaza-1,3-butadiene (**c**)

1.13 g (8 mmol) of 2-chlorobenzylamine were added dropwise at 0oC, over 0.47 g (8mmol) of aq. glyoxal (40%) in 5 ml of water. A white solid was formed and the mixture was allowed to stir for 5 min. The solid was filtered off and washed with cold water and ethyl ether. (Yields 75%). Data for **c** : 1H NMR: (CDCl3): 8.09 (s, 2H, Him)), 7.00-7.40 (m, 8H), 4.90 (s, 4H, CH2).

-1,4-Bis(2-Chlorobenzyl)-2,3-diphenyl-1,4-diaza-1,3-butadiene (**d**)

Over a solution of 1.55 g (11.0 mmol) of 2-chlorobenzylamine and 7 ml (50mmol) of NEt3 in 30 ml of toluene at 0ºC, 1.3 ml (12 mmol) of TiCl4 was added. Over the orange solid formed, 1.05 g (5 mmol) of 1,2-diphenylethane dione in 20 mol of toluene was added. The mixture was refluxed for 5 hours, treated with 25 ml of HCl 1.5M, and the organic phase was extracted and dried over Na2SO4. The solution was filtered and the solvent removed under vacuum. A white solid was obtained after recrystallisation of ethanol (Yield 52%) Data for **d** : Anal. Found: C, 66.2; H, 6.3; N, 7.8. Calcd for C26H22Cl2N2: C, 66.49; H, 6.14; N, 7.75. 1H NMR (DMSO-d6): 7.88 [d, 3J(HH)=8.0, 4H], 7.0-7.6 (m, 14H), 4.64 (s, 4H, CH2) ); (C=N) = 1615 cm-1.

#### Pyridine-imine

-2-acetyl-[(2-chlorophenyl)-methylimine]-pyridine (**f**), 2-acetyl-[2-(2-chlorophenyl)-ethylimine]-pyridine (**g**)

1 g (8.3 mmol) of 2-acetylpyridine and 8.3 mmol of the appropriate amine were dissolved in 20 cm3 of anhydrous ethanol and the resulting solution was refluxed for 8 hours. The water formed in the reaction was eliminated together with the solvent by distillation under vacuum. Another 15 cm3 of anhydrous EtOH were added, and the process repeated three times, until the 1H NMR showed a conversion of 90%. The oils obtained contain the diimines, nearly in pure form, and were used without further purification. Yields 80-90%. Data for **f**: 1H NMR (CDCl3): 8.61 [d, 1H, 3J(HH)=5.0], 8.22 [d, 3J(HH)=10, 1H], 7.60-7.80 (m, 6H), 4.80 (s, 2H, CH2), 2.49 (s, 3H, CH3). Data for **g** : 1H NMR (CDCl3): 8.59 (m, 1H), 8.08 [dd, 3J(HH)=8.8, 4J(HH)=1.0, 1H], 7.71 [td, 3J(HH)=7.7, 4J(HH)=1.8, 1H], 7.00-7.40 (m, 5H), 3.82 [t, 3J(HH)=7.5, CH2], 3.22 [t, 3J(HH)=7.5, CH2], 2.30 (s, 3H, CH3).
