# Supplementary material for: Nickelacycles with anionic C–N–N′ terdentate α-diimine based ligands. Reaction with ethylene
Source: Royal Society of Chemistry journal article supplement (doi:10.1039/b302375c), 2003-01-01
Supplement: b302375c2.doc [file b302375c2.doc]

Nickelacycles with anionic C-N-N' terdentate -diimine based ligands. Reaction with ethylene

Rosa M. Ceder*, Guillermo Muller* and Matías Ordinas

Departament de Química Inorgànica, Universitat de Barcelona, Martí i Franquès, 1-11, 08028 Barcelona, Spain.

Mercè Font-Bardia and Xavier Solans

*Departament de Cristal.lografia, Mineralogia i Dipòsits Minerals, Universitat de Barcelona, Martí i Franquès s/n, 08028 Barcelona, Spain*

Fig. S1. Schulz-Flory distribution of olefins at 25˚C and 20 bars of ethylene obtained for the catalytic precursors **3a**, **3e**, **3f**, **3g**. Each point represent the whole mixture of linear and branched olefins of Cn
